# Supplementary material for: Novel analytical methods to interpret large sequencing data from small sample sizes
Source: Hum Genomics. 2019 Aug 30;13:41. doi: 10.1186/s40246-019-0235-1 (PMC6717342; doi:10.1186/s40246-019-0235-1)
Supplement: Supplementary file 1 — Table S1. Description of ANNOVAR annotations. (XLSX 13 kb) [file 40246_2019_235_MOESM1_ESM.xlsx]

## Sheet: ANNOVAR annotations
Annotation	Explanation	Sequence Ontology
Localization in the genome
exonic	variant overlaps a coding region	exon_variant (SO:0001791)
splicing	variant is within 2-bp of a splicing junction	splicing_variant (SO:0001568)
ncRNA	variant overlaps a transcript without coding annotation in the gene definition	non_coding_transcript_variant (SO:0001619)
UTR5	variant overlaps a 5' untranslated region	5_prime_UTR_variant (SO:0001623)
UTR3	variant overlaps a 3' untranslated region	3_prime_UTR_variant (SO:0001624)
intronic	variant overlaps an intron	intron_variant (SO:0001627)
upstream	variant overlaps 1-kb region upstream of transcription start site	upstream_gene_variant (SO:0001631)
downstream	variant overlaps 1-kb region downtream of transcription end site	downstream_gene_variant (SO:0001632)
intergenic	variant is in intergenic region	intergenic_variant (SO:0001628)
Type of variant
frameshift insertion	an insertion of one or more nucleotides that cause frameshift changes in protein coding sequence	frameshift_elongation (SO:0001909)
frameshift deletion	a deletion of one or more nucleotides that cause frameshift changes in protein coding sequence	frameshift_truncation (SO:0001910)
frameshift block substitution	a block substitution of one or more nucleotides that cause frameshift changes in protein coding sequence	frameshift_variant (SO:0001589)
stopgain	a nonsynonymous SNV, frameshift insertion/deletion, nonframeshift insertion/deletion or block substitution that lead to the immediate creation of stop codon at the variant site. For frameshift mutations, the creation of stop codon downstream of the variant will not be counted as "stopgain"!	stop_gained (SO:0001587)
stoploss	a nonsynonymous SNV, frameshift insertion/deletion, nonframeshift insertion/deletion or block substitution that lead to the immediate elimination of stop codon at the variant site	stop_lost (SO:0001578)
nonframeshift insertion	an insertion of 3 or multiples of 3 nucleotides that do not cause frameshift changes in protein coding sequence	inframe_insertion (SO:0001821)
nonframeshift deletion	a deletion of 3 or mutliples of 3 nucleotides that do not cause frameshift changes in protein coding sequence	inframe_deletion (SO:0001822)
nonframeshift block substitution	a block substitution of one or more nucleotides that do not cause frameshift changes in protein coding sequence	inframe_variant (SO:0001650)
nonsynonymous SNV	a single nucleotide change that cause an amino acid change	missense_variant (SO:0001583)
synonymous SNV	a single nucleotide change that does not cause an amino acid change	synonymous_variant (SO:0001819)
