# Supplementary material for: Novel analytical methods to interpret large sequencing data from small sample sizes
Source: Hum Genomics. 2019 Aug 30;13:41. doi: 10.1186/s40246-019-0235-1 (PMC6717342; doi:10.1186/s40246-019-0235-1)
Supplement: Supplementary file 4 — Table S4. Rank product results. (XLSX 23 kb) [file 40246_2019_235_MOESM4_ESM.xlsx]

## Sheet: All poly., theoretical MAF 
All polymorphisms
Theoretical MAF added
684 polymorphisms
Rank products (10 top genes)
Mean of frequencies
gene	gene.index	RP/Rsum	FC:(class1/class2)	pfp	P.value
SOCS1	46	1	9.818e-12	0.0005777	7.539e-06
UGT1A9	48	2	4.707e-11	0.259	0.0007529
PTPN1	35	3	1.242e-03	0.4536	0.006369
PTPN22	37	4	4.409e-02	0.4896	0.02224
RPA2	40	5	4.495e-01	0.6148	0.05241
ORM1	33	6	5.397e-01	0.635	0.09836
CYP1A2	9	7	5.963e-01	0.6575	0.1587
SLC22A4	43	8.239	6.881e-01	0.7656	0.2563
CYP3A4	14	9.212	8.688e-01	0.7745	0.3372
ERCC5	19	9.487	8.781e-01	0.7763	0.3353
Sum of frequencies/gene size
gene	gene.index	RP/Rsum	FC:(class1/class2)	pfp	P.value
SOCS1	42	1	0.0009596	9.632e-06	2.049e-07
UGT1A9	44	2	0.2813	0.000962	4.093e-05
PTPN1	31	3.224	0.5231	0.01199	0.0007654
PTPN22	33	3.722	0.5251	0.01929	0.001642
RPA2	36	5.233	0.6782	0.07962	0.00847
ORM1	29	5.733	0.6847	0.09896	0.01263
CYP1A2	8	7	0.7307	0.1909	0.02844
CYP3A4	13	8	0.7857	0.274	0.04664
ERCC5	18	9	0.8125	0.3665	0.07019
SLC22A4	39	10	0.8337	0.4651	0.09896

## Sheet: Poly with no AltAF excluded
Polymorphisms with no AltAF excluded
554 polymorphisms
Rank products (10 top genes)
Mean of frequencies
gene	gene.index	RP/Rsum	FC:(class1/class2)	pfp	P.value
SOCS1	46	1	0.0005777	7.539e-06	1.478e-07
UGT1A9	48	2	0.259	0.0007529	2.953e-05
PTPN1	35	3	0.4473	0.006369	0.0003746
PTPN22	37	4	0.4896	0.02224	0.001744
RPA2	40	5	0.6148	0.05241	0.005139
ORM1	33	6	0.633	0.09836	0.01157
CYP1A2	9	7	0.6575	0.1587	0.02178
PPP2R2A	34	8.239	0.7324	0.2563	0.0402
HIF1A	24	8.972	0.7435	0.308	0.05435
SLC22A4	43	10.24	0.7656	0.4313	0.08456
Sum of frequencies/gene size
gene	gene.index	RP/Rsum	FC:(class1/class2)	pfp	P.value
SOCS1	42	1	0.0009596	9.632e-06	2.049e-07
UGT1A9	44	2	0.2813	0.000962	4.093e-05
PTPN22	33	3	0.5251	0.008053	0.000514
PTPN1	31	4	0.5559	0.02781	0.002366
ORM1	29	5.233	0.6685	0.07962	0.00847
RPA2	36	5.958	0.6782	0.1166	0.01488
CYP1A2	8	7	0.7307	0.1909	0.02844
PPP2R2A	30	8	0.7457	0.274	0.04664
HIF1A	22	9	0.7645	0.3665	0.07019
SLC22A4	39	10.49	0.8337	0.5396	0.1148

## Sheet: Causing alteration, theo. MAF
Variants causing protein alterations
Theoretical MAF added
105 polymorphisms
Rank products (10 top genes)
Mean of frequencies
gene	gene.index	RP/Rsum	FC:(class1/class2)	pfp	P.value
UGT1A9	26	1	0.2485	4.555e-05	1.627e-06
PTPN22	19	2	0.4849	0.00455	0.000325
ERCC5	12	3	0.6525	0.03452	0.003699
XPC	28	4	0.693	0.1087	0.01552
SLC22A1	22	5	0.7215	0.2288	0.04085
CYP2C9	7	6.481	0.7478	0.4942	0.1059
ULK3	27	6.481	0.747	0.4236	0.1059
CYP2C19	5	7.737	0.7745	0.6484	0.1853
CYP2C8	6	9.487	0.8348	0.9958	0.3201
SLC22A4	23	9.487	0.8367	0.8962	0.3201
Sum of frequencies/gene size
gene	gene.index	RP/Rsum	FC:(class1/class2)	pfp	P.value
UGT1A9	26	1	0.2792	4.555e-05	1.627e-06
PTPN22	19	2	0.5235	0.00455	0.000325
ERCC5	12	3	0.6757	0.03452	0.003699
XPC	28	4	0.7332	0.1087	0.01552
CYP2C9	7	5	0.7598	0.2288	0.04085
CYP2C19	5	6.481	0.7901	0.4942	0.1059
SLC22A1	22	6.481	0.7867	0.4236	0.1059
CYP2C8	6	8	0.8458	0.7144	0.2041
ULK3	27	9.24	0.8735	0.9336	0.3001
IFNGR2	16	9.74	0.8836	0.9541	0.3408

## Sheet: Causing alteration, no AltAF
Variants causing protein alterations
Polymorphisms with no AltAF excluded
82 polymorphisms
Rank product (10 top genes)
Mean of frequencies
gene	gene.index	RP/Rsum	FC:(class1/class2)	pfp	P.value
ORM1	18	1	0.2129	4.555e-05	1.627e-06
UGT1A9	26	2	0.2473	0.00455	0.000325
PTPN22	19	3	0.4843	0.03452	0.003699
XPC	28	4	0.7134	0.1087	0.01552
CYP2C9	7	5.477	0.7476	0.3258	0.05818
ULK3	27	5.477	0.7462	0.2715	0.05818
ERCC5	12	7.238	0.7677	0.6056	0.1514
CYP2C19	5	7.937	0.7732	0.6984	0.1995
SLC22A1	22	8.485	0.7832	0.7482	0.2405
CYP2C8	6	10.49	0.836	1.126	0.4021
Sum of frequencies/gene size
gene	gene.index	RP/Rsum	FC:(class1/class2)	pfp	P.value
ORM1	18	1	0.2394	4.555e-05	1.627e-06
UGT1A9	26	2	0.2792	0.00455	0.000325
PTPN22	19	3	0.5235	0.03452	0.003699
CYP2C9	7	4.472	0.7598	0.1793	0.02561
XPC	28	4.472	0.7612	0.1434	0.02561
SLC22A1	22	6.701	0.7881	0.5522	0.1183
CYP2C19	5	6.928	0.7901	0.5275	0.1319
ERCC5	12	7.2	0.7913	0.5214	0.149
CYP2C8	6	9	0.8458	0.8737	0.2808
ULK3	27	10	0.8735	1.014	0.3621
